# Supplementary material
Source: MDPI journal article supplement (https://www.mdpi.com/2073-4344/12/10/1208)
Supplement: s1 [file s1]

## Supporting Information

### Behavior of N-doped TiO<sub>2</sub> and N-doped ZnO in Photocatalytic Azo Dye Degradation under UV and Visible Light Irradiation: A Preliminary Investigation

Olga Sacco <sup>1</sup>, Antonietta Mancuso <sup>2</sup>, Vincenzo Venditto <sup>1</sup>, Stefania Pragliola <sup>1</sup> and Vincenzo Vaiano <sup>2,\*</sup>

<sup>1</sup> Department of Chemistry and Biology "A. Zambelli", INSTM Research Unit, University of Salerno, Via Giovanni Paolo II, 132, 84084 Fisciano, SA, Italy

<sup>2</sup> Department of Industrial Engineering, University of Salerno, Via Giovanni Paolo II 132, 84084 Fisciano, SA, Italy

\* Correspondence: vvaiano@unisa.it; Tel.: +39-089964340

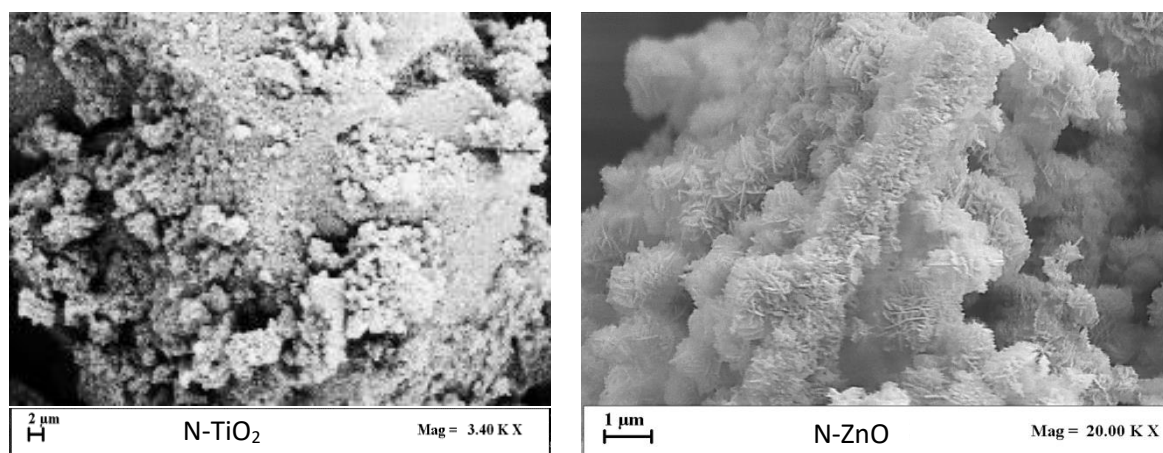

Figure S1. SEM images of N-TiO<sub>2</sub> and N-ZnO
